# Supplementary material for: A Ketogenic Low-Carbohydrate High-Fat Diet Increases LDL Cholesterol in Healthy, Young, Normal-Weight Women: A Randomized Controlled Feeding Trial
Source: MDPI journal article supplement (doi:10.3390/nu13030814), 2021-03-02
Supplement: s1 [file s1]

Supplemental Figure S1. Daily ketone bodies in urine

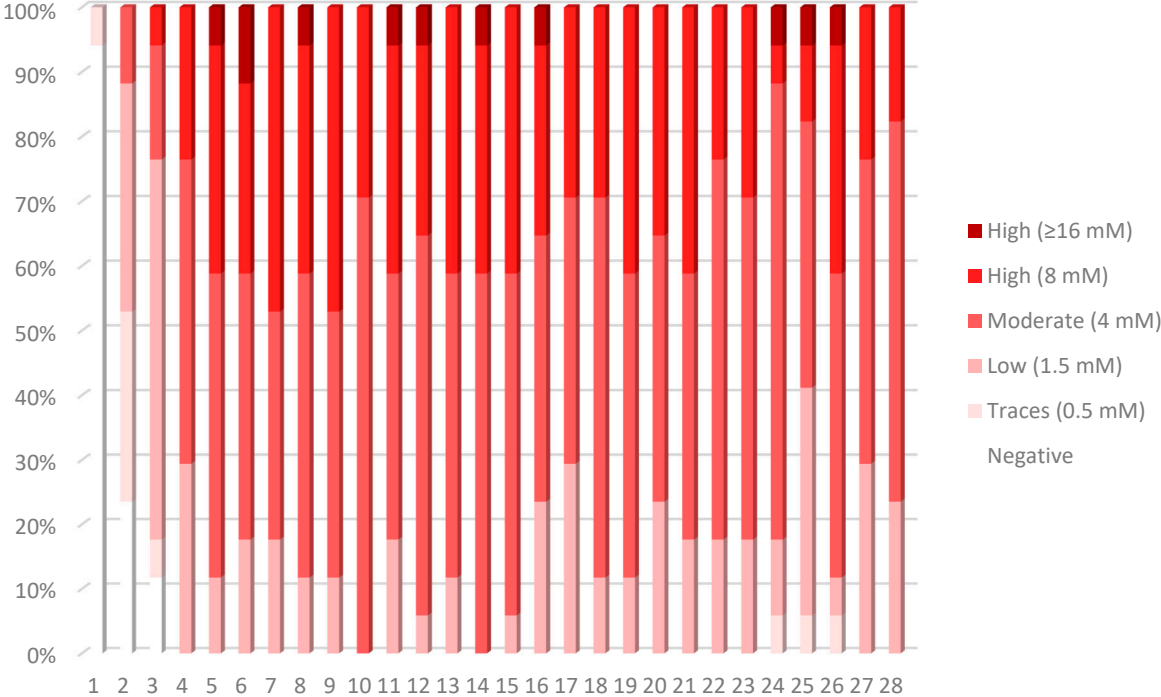

Daily urinary ketones in participants ( $n = 17$ ) eating a ketogenic LCHF diet (Day 1-28, x-axis). Each bar (100%, y-axis) corresponds to all 17 participants.

**Supplemental Table S1.** Treatment effects of a four-week ketogenic LCHF diet adjusted for relative weight change<sup>1</sup>

| Parameters                   | Treatment effect<br>(95% CI) | <i>p</i> value |
|------------------------------|------------------------------|----------------|
| Primary outcome, mM          |                              |                |
| LDL cholesterol              | 1.83 [0.83, 2.84]            | <0.01          |
| LDL subfractions, mg/dL      |                              |                |
| LDL 1-2 (large, buoyant LDL) | 34.97 [18.07, 51.88]         | <0.001         |
| LDL 3-7 (small, dense LDL)   | 6.09 [1.50, 10.69]           | <0.05          |
| LDL particle size, nm        |                              |                |
| LDL size                     | -1.72 [-4.69, 1.24]          | 0.23           |
| Blood Biochemistry, mM       |                              |                |
| Glucose                      | -0.31 [-0.64, 0.01]          | 0.059          |
| Insulin                      | -2.64 [-4.55, -0.73]         | <0.05          |
| Standard chemical lipids, mM |                              |                |
| TG                           | 0.16 [0.03, 0.29]            | <0.05          |
| TC                           | 2.26 [1.21, 3.31]            | <0.001         |
| HDL cholesterol              | 2.26 [1.21, 3.31]            | <0.001         |
| Non-HDL cholesterol          | 1.98 [0.98, 2.98]            | <0.001         |
| Apolipoproteins, g/L         |                              |                |
| ApoB                         | 0.52 [0.26, 0.77]            | <0.001         |
| ApoA-I                       | 0.40 [0.28, 0.53]            | <0.001         |
| Ratios                       |                              |                |
| Total cholesterol/HDL        | 0.93 [0.39, 1.46]            | <0.01          |
| ApoB/ApoA-I                  | 0.19 [0.05, 0.33]            | <0.05          |
| LDL/HDL                      | 0.85 [0.31, 1.39]            | <0.01          |

<sup>1</sup>The treatment effect is statistically significant when  $p < 0.05$ . Data were analyzed using a mixed model, with post measurements of each period as the dependent variable. Period baseline measurements, and diet were included as fixed effects and subject was included as a random effect. Subject-averaged period baseline values were included as fixed covariates, to avoid cross-level bias. LCHF, Low-carbohydrate high-fat; TG, Triacylglycerol; TC, Total cholesterol; ApoB, Apolipoprotein B-100; ApoA-I, Apolipoprotein A-I.
